# Supplementary material for: Variable sexually dimorphic gene expression in laboratory strains of Drosophila melanogaster
Source: PubMed Central journal article supplement (PMC2244638; doi:10.1186/1471-2164-8-454), 2007-12-10

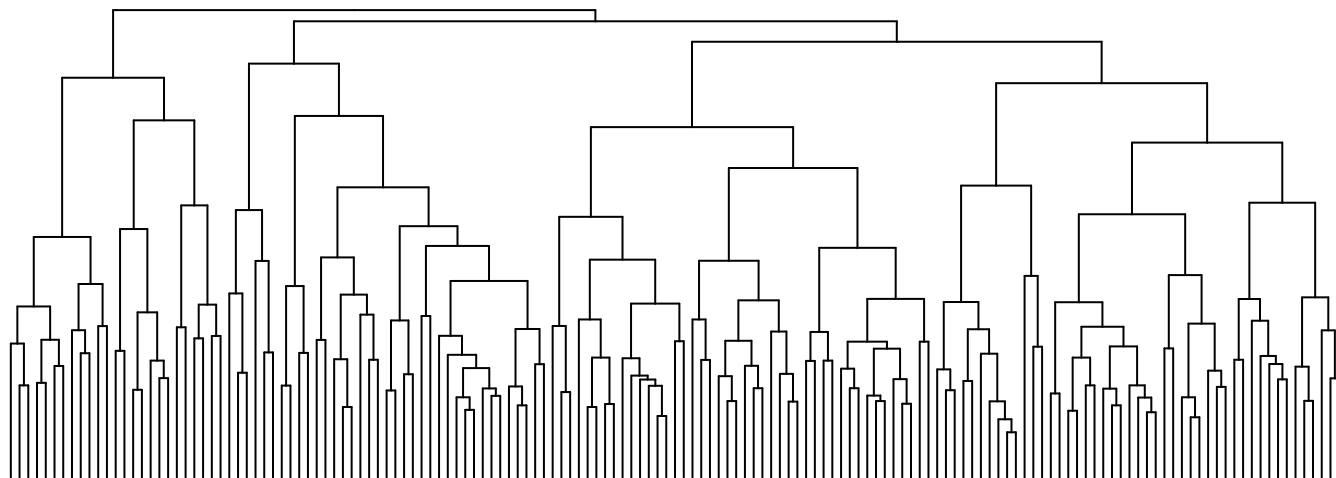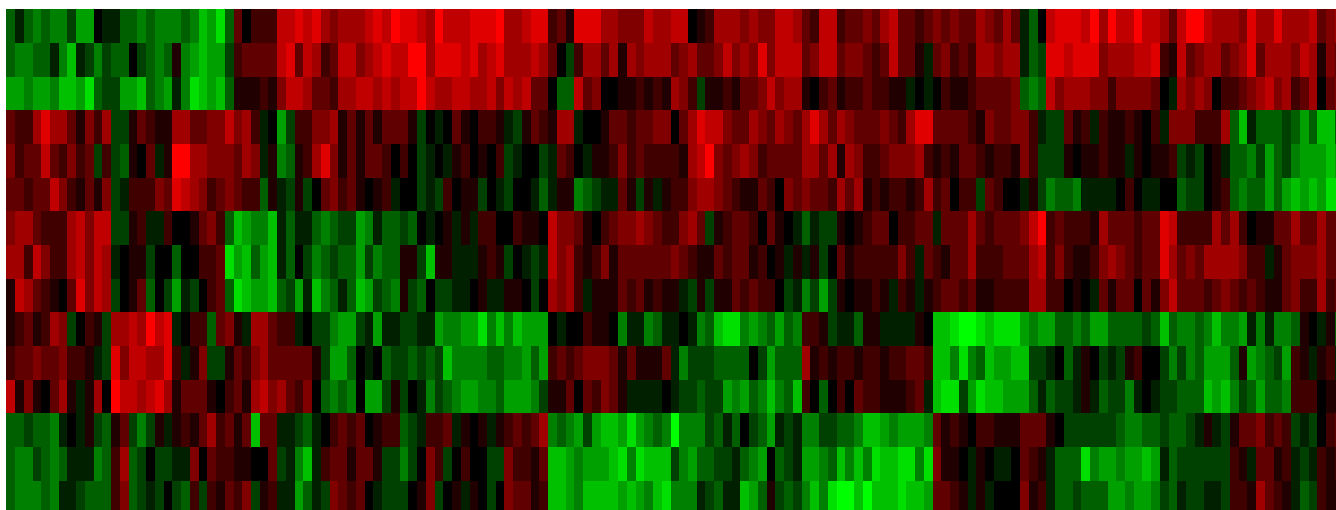

Testis Specific

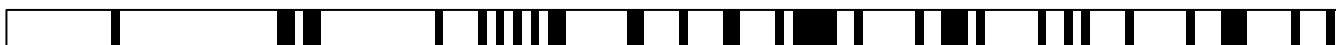

Supplement: 1471-2164-8-454-S3.pdf [file 1471-2164-8-454-S3.pdf]
